# Supplementary material for: Purification and Characterization of Ornithine Decarboxylase from Aspergillus terreus; Kinetics of Inhibition by Various Inhibitors
Source: PubMed Central journal article supplement (PMC6696095; doi:10.3390/molecules24152756), 2019-07-29
Supplement: molecules-24-02756-s001.pdf [file molecules-24-02756-s001.pdf]

**Table S1:** Potentiality of recovered fungal isolates to grow on modified Czapek's-Dox medium of L-ornithine as sole nitrogen source.

| Source            | Isolate No. | Fungal isolate                           | Visual fungal growth on L-ornithine as sole N source |
|-------------------|-------------|------------------------------------------|------------------------------------------------------|
| Saprophytic fungi | 1           | <i>Aspergillus terreus</i>               | +++                                                  |
|                   | 2           | <i>A. fumigates</i>                      | +                                                    |
|                   | 3           | <i>A. flavus</i>                         | +                                                    |
|                   | 4           | <i>A. parasiticus</i>                    | ++                                                   |
|                   | 5           | <i>A. oryzae</i>                         | +++                                                  |
|                   | 6           | <i>A. niger</i>                          | +                                                    |
|                   | 7           | <i>A. tamarii</i>                        | ++                                                   |
|                   | 8           | <i>A. carneus</i>                        | -                                                    |
|                   | 9           | <i>A.sparsus</i>                         | -                                                    |
|                   | 10          | <i>A. niveus</i>                         | -                                                    |
|                   | 11          | <i>A.ochraceos</i>                       | -                                                    |
|                   | 12          | <i>A. flavipes</i>                       | -                                                    |
|                   | 13          | <i>A.candidus</i>                        | -                                                    |
|                   | 14          | <i>Fusarium</i> sp                       | +                                                    |
|                   | 15          | <i>F. fujikuroi</i>                      | +++                                                  |
|                   | 16          | <i>F. oxyporum</i>                       | -                                                    |
|                   | 17          | <i>Penicillium crustosum</i>             | +++                                                  |
|                   | 18          | <i>P. notatum</i>                        | -                                                    |
|                   | 19          | <i>Humicola</i> sp                       | -                                                    |
|                   | 20          | <i>Colletotricum</i> sp                  | -                                                    |
| Endophytic fungi  | 21          | <i>A. terreus</i> P.C.                   | ++                                                   |
|                   | 22          | <i>A.flavus</i> P.S.1                    | +                                                    |
|                   | 23          | <i>A.flavus</i> P.S.2                    | +                                                    |
|                   | 24          | <i>A. versicolor</i>                     | +                                                    |
|                   | 25          | <i>A. terreus</i> P.S.                   | +                                                    |
|                   | 26          | <i>A.s fumigatus</i>                     | -                                                    |
|                   | 27          | <i>A. oryzae</i>                         | -                                                    |
|                   | 28          | <i>A. niger</i>                          | -                                                    |
|                   | 29          | <i>A. flavus</i> var <i>columnaris</i> 1 | -                                                    |
|                   | 30          | <i>A.flavus</i> P.S.3                    | -                                                    |
|                   | 31          | <i>A. flavus</i> var <i>columnaris</i> 2 | -                                                    |
|                   | 32          | <i>F.proliferatum</i>                    | +                                                    |
|                   | 33          | <i>Fusarium moniliforme</i>              | +                                                    |
|                   | 34          | <i>Fusarium oxysporum</i>                | +                                                    |
|                   | 35          | <i>P. chermesinum</i>                    | +                                                    |
|                   | 36          | <i>P.chrysogenum</i>                     | +                                                    |
|                   | 37          | <i>Cladosporium</i> sp                   | -                                                    |
|                   | 38          | <i>Cunninghamella</i> sp                 | -                                                    |
|                   | 39          | <i>Penicillium</i> sp P.L.               | -                                                    |
|                   | 40          | <i>Penicillium</i> sp P.S.               | -                                                    |

Podocarpus gracilior cork (PC); Podocarpus stem (PS); Podocarpus leaves (PL).
